# Supplementary material
Source: PubMed Central journal article supplement (PMC4329029)
Supplement: NIHMS657652-supplement-Supp_DataS1.pdf [file NIHMS657652-supplement-Supp_DataS1.pdf]

## Data Supplement 1. Sample chest compression process files

### Philips cardiac monitor:

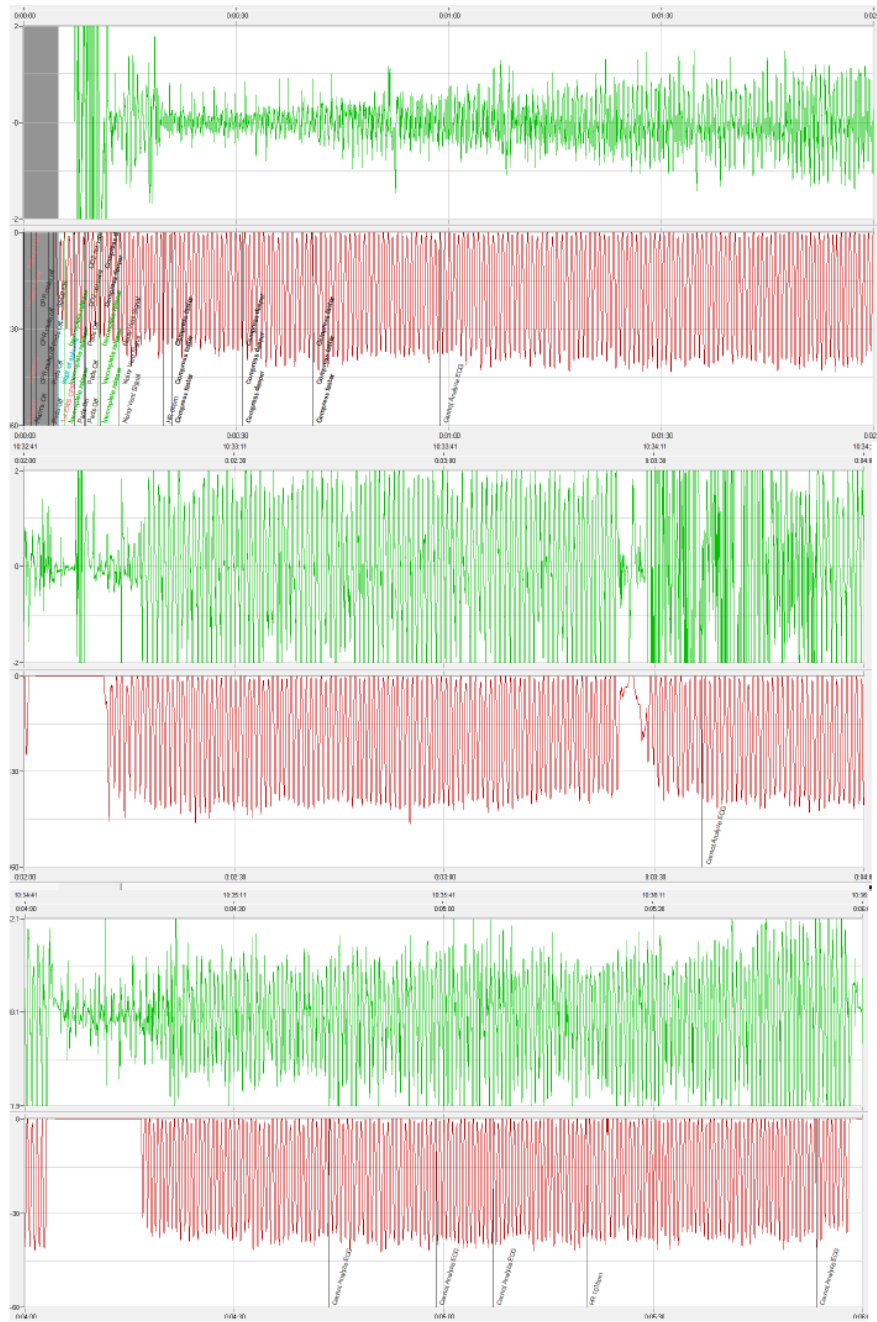

**Sample chest compression process file and summary report from Zoll cardiac monitor:**

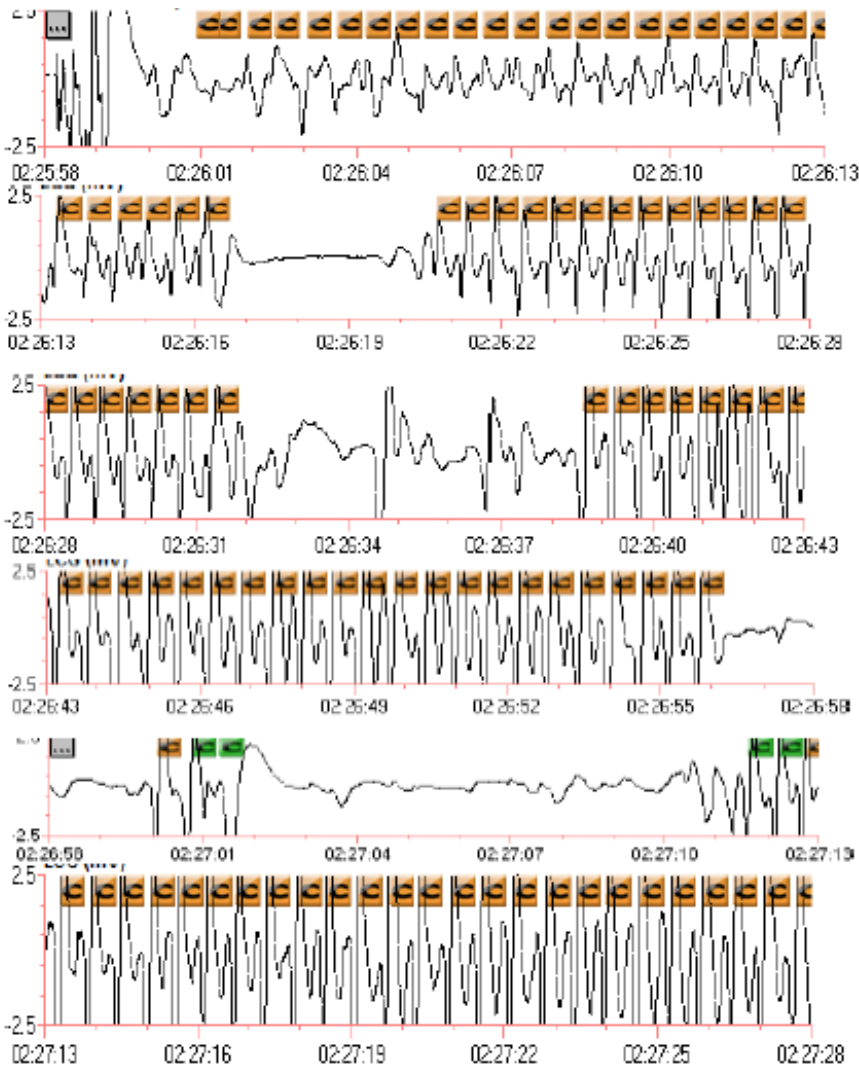

| Minute | Sec. w/c Comp. | Vents | Vents Imped. | Vents CO2 | Comp. Count | Comp. Rate | Comp. Fraction | Unanal. Sec. | Mean Comp. Depth | Comp. in Target Depth | Mean etCO2 |
|--------|----------------|-------|--------------|-----------|-------------|------------|----------------|--------------|------------------|-----------------------|------------|
| 1      | 13             | 0     | 2            | 0         | 78          | 93         | 78.33 %        | 0            | 2.42             | 0.00 %                | 0.00       |
| 2      | 20             | 0     | 1            | 0         | 63          | 94         | 66.67 %        | 0            | 2.45             | 6.35 %                | 0.00       |
| 3      | 10             | 0     | 3            | 0         | 77          | 92         | 83.33 %        | 0            | 2.41             | 2.60 %                | 0.00       |
| 4      | 7              | 0     | 0            | 0         | 35          | 92         | 75.67 %        | 0            | 2.53             | 0.00 %                | 0.00       |
