# Supplementary material
Source: PubMed Central journal article supplement (PMC4329029)

**Data Supplement 2. Example of identification of CPR chest compression segments.**

Clock time (angled numbers) identified for beginning and end of each chest compression segment.

Automated chest compression pattern classification based upon chest compression segments identified in this manner.

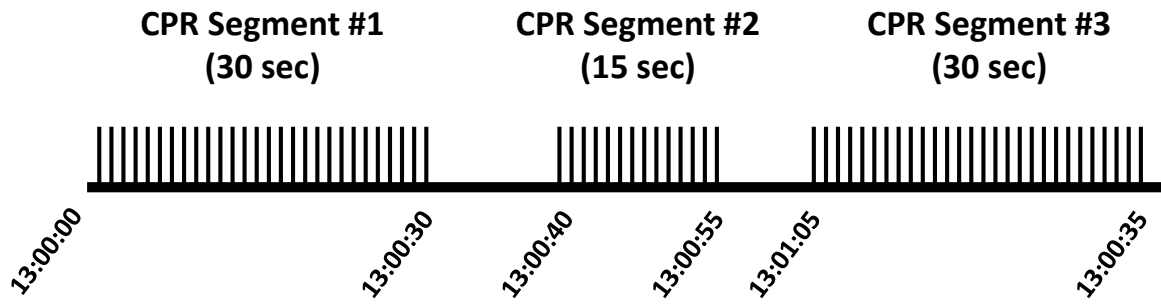

Supplement: NIHMS657652-supplement-Supp_DataS2.pdf [file NIHMS657652-supplement-Supp_DataS2.pdf]
